# Supplementary material
Source: Springer Nature journal article supplement (https://www.springermedizin.de/resource/supplementary/12906_2010_470_MOESM5_ESM.pdf/9519566)

Effect of Plumbagin on IL-2 production in collagen Type II induced arthritic mice

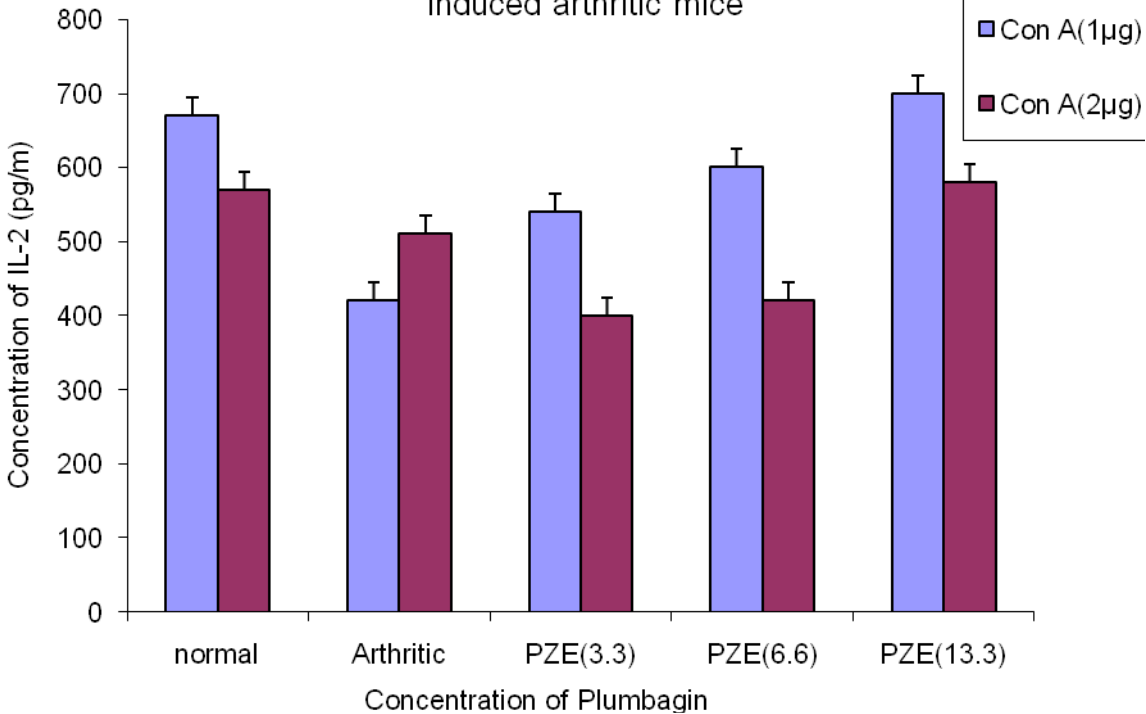

Supplement: MOESM5 [file 9519566]
